# Supplementary material
Source: PubMed Central journal article supplement (PMC5659833)
Supplement: NIHMS902941-supplement-005485_-_Supplemental_Material.pdf [file NIHMS902941-supplement-005485_-_Supplemental_Material.pdf]

## SUPPLEMENTAL MATERIAL

**Supplemental Figure 1. Risk of Sudden Cardiac Death associated with QT Interval Components per 1-SD Increase in Lead V5**

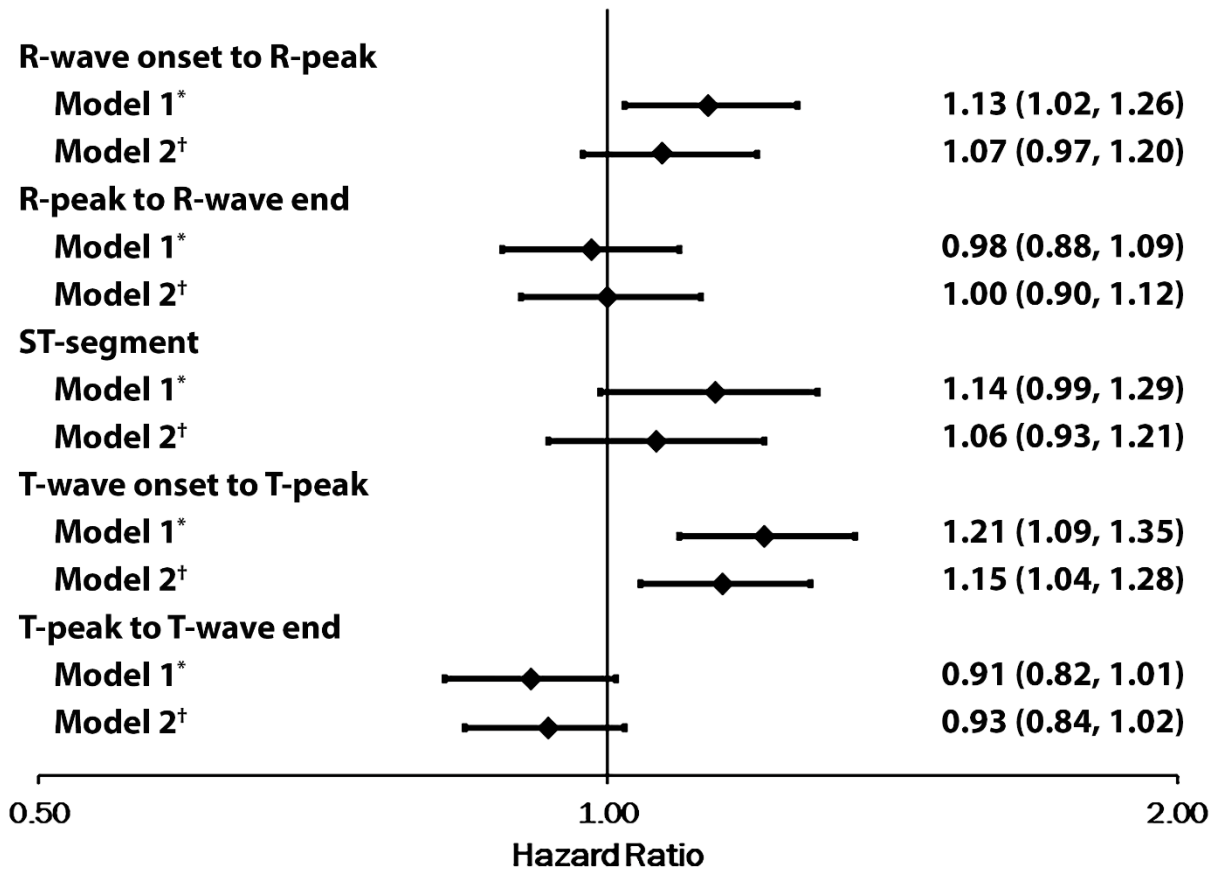

\* Adjusted for age, sex, race, and heart rate.

† Adjusted for Model 1 covariates plus smoking, systolic blood pressure, diabetes, body mass index, low-density lipoprotein cholesterol, antihypertensive medication use, and left ventricular hypertrophy.
